# Supplementary material
Source: PubMed Central journal article supplement (PMC10786170)
Supplement: NIHMS1949999-supplement-1.pdf [file NIHMS1949999-supplement-1.pdf]

## 1. Supplementary Information:

### A. Flat Files

Complete the Inventory below for all additional textual information and any additional Supplementary Figures, which should be supplied in one combined PDF file.

- **Row 1:** A combined, flat PDF containing any Supplementary Text, Discussion, Notes, Additional Supplementary Figures, Supplementary Protocols, simple tables, and all associated legends. Only one such file is permitted.
- **Row 2:** Nature Research’s Reporting Summary; if previously requested by the editor, please provide an updated Summary, fully completed, without any mark-ups or comments. **(Reporting Summaries are not required for all manuscripts.)**

| Item                      | Present? | Filename<br>This should be the name the file is saved as when it is uploaded to our system, and should include the file extension. The extension must be .pdf | A brief, numerical description of file contents.<br>i.e.: <i>Supplementary Figures 1-4, Supplementary Discussion, and Supplementary Tables 1-4.</i> |
|---------------------------|----------|---------------------------------------------------------------------------------------------------------------------------------------------------------------|-----------------------------------------------------------------------------------------------------------------------------------------------------|
| Supplementary Information | Yes      | SupplementaryInformation.pdf                                                                                                                                  | Supplementary Figures 1-3, Supplementary Tables 1-3, Supplementary Notes, Supplementary References                                                  |
| Reporting Summary         | Yes      | ReportingSummary.pdf                                                                                                                                          |                                                                                                                                                     |
| Peer Review Information   | Yes      | OFFICE USE ONLY                                                                                                                                               |                                                                                                                                                     |

## B. Additional Supplementary Files

Complete the Inventory below for all additional Supplementary Files that cannot be submitted as part of the Combined PDF.

- Do not list Supplementary Figures in this table (see section 2A)
- Where possible, include the title and description within the file itself
- Spreadsheet-based tables & data should be combined into a workbook with multiple tabs, not submitted as individual files.
- Compressed files are acceptable where necessary. ZIP files are preferred.
- Please note that the *ONLY* allowable types of additional Supplementary Files are:
  - Supplementary Tables
  - Supplementary Audio
  - Supplementary Videos
  - Supplementary Software
  - Supplementary Data, for example: raw NMR Data, Cryo-EM Data, Computational Data, Crystallographic Data, etc.

| <b>Type</b>     | <b>Number</b><br>If there are multiple files of the same type this should be the numerical indicator. i.e. "1" for Video 1, "2" for Video 2, etc. | <b>Filename</b><br>This should be the name the file is saved as when it is uploaded to our system, and should include the file extension. i.e.: <i>Smith_Supplementary_Video_1.mov</i> | <b>Legend or Descriptive Caption</b><br>Describe the contents of the file |
|-----------------|---------------------------------------------------------------------------------------------------------------------------------------------------|----------------------------------------------------------------------------------------------------------------------------------------------------------------------------------------|---------------------------------------------------------------------------|
| Choose an item. |                                                                                                                                                   |                                                                                                                                                                                        |                                                                           |

Add rows as needed to accommodate the number of files.

## 2. Source Data

### Complete the Inventory below for all Source Data files.

- Acceptable types of Source Data for Main Figures and Extended Data Figures are:
  - Statistical Source Data
    - Plain Text (ASCII, TXT) or Excel formats only
    - One file for each relevant Figure, containing all source data
  - Full-length, unprocessed Gels or Blots
    - JPG, TIF, or PDF formats only
    - One file for each relevant Figure, containing all supporting blots and/or gels
- ‘Source Data’ is only allowed for Main Figures and Extended Data Figures.
  - Include Unprocessed Gels or Blots for Supplementary Figures as additional Supplementary Figures.
  - Include Statistical Source Data for Supplementary Figures as ‘Supplementary Data’ files and list them in section 2B.
  - Please see [this example of Source Data](#) in a publication.

| <b>Parent Figure or Table</b> | <b>Filename</b><br>This should be the name the file is saved as when it is uploaded to our system, and should include the file extension. i.e.: <i>Smith_SourceData_Fig1.xls</i> , or <i>Smith_Unmodified_Gels_Fig1.pdf</i> | <b>Data description</b><br>i.e.: Unprocessed Western Blots and/or gels, Statistical Source Data, etc.                     |
|-------------------------------|-----------------------------------------------------------------------------------------------------------------------------------------------------------------------------------------------------------------------------|---------------------------------------------------------------------------------------------------------------------------|
| <b>Source Data Fig. 1</b>     |                                                                                                                                                                                                                             |                                                                                                                           |
| <b>Source Data Fig. 2</b>     | SourceData_Fig2.xlsx                                                                                                                                                                                                        | Quantification of condensates in living cells and quantification of dilute and dense phase based on different constructs. |
| <b>Source Data Fig. 3</b>     | SourceData_Fig3.xlsx                                                                                                                                                                                                        | Evaluations of the molecular dynamics and permeability of                                                                 |

|                                          |                                  |                                                                                                             |
|------------------------------------------|----------------------------------|-------------------------------------------------------------------------------------------------------------|
|                                          |                                  | synthetic DNA condensates.                                                                                  |
| <b>Source Data Fig. 4</b>                | SourceData_Fig4.xlsx             | DNA sequestration performance based on percentage and fractions of cellular population.                     |
| <b>Source Data Fig. 5</b>                | SourceData_Fig5.xlsx             | Transcription amplification data based on fluorescence quantification.                                      |
| <b>Source Data Fig. 6</b>                | SourceData_Fig6.xlsx             | Protein activity quantification based on fluorescence quantification.                                       |
| <b>Source Data Fig. 7</b>                |                                  |                                                                                                             |
| <b>Source Data Fig. 8</b>                |                                  |                                                                                                             |
| <b>Source Data Extended Data Fig. 1</b>  | SourceData_ExtendedDataFig1.xlsx | Estimation intracellular protein concentration using calibrated curve.                                      |
| <b>Source Data Extended Data Fig. 2</b>  |                                  |                                                                                                             |
| <b>Source Data Extended Data Fig. 3</b>  | SourceData_ExtendedDataFig3.xlsx | Evaluation of phase diagram using sedimentation assay.                                                      |
| <b>Source Data Extended Data Fig. 4</b>  | SourceData_ExtendedDataFig4.xlsx | Component diffusion kinetics analysis.                                                                      |
| <b>Source Data Extended Data Fig. 5</b>  | SourceData_ExtendedDataFig5.xlsx | Effects of heterotypic driving forces on phase diagram.                                                     |
| <b>Source Data Extended Data Fig. 6</b>  | SourceData_ExtendedDataFig6.xlsx | Plasmid partition fraction based on different components.                                                   |
| <b>Source Data Extended Data Fig. 7</b>  | SourceData_ExtendedDataFig7.xlsx | Computational simulation data on plasmid sequestration.                                                     |
| <b>Source Data Extended Data Fig. 8</b>  | SourceData_ExtendedDataFig8.xlsx | Cell viability data and quantification of fluorescence signals of synthetic condensates in mammalian cells. |
| <b>Source Data Extended Data Fig. 9</b>  |                                  |                                                                                                             |
| <b>Source Data Extended Data Fig. 10</b> |                                  |                                                                                                             |

**nature portfolio**
